# Supplementary material
Source: PubMed Central journal article supplement (PMC9150816)
Supplement: NIHMS1807914-supplement-Supplementary_Material.pdf [file NIHMS1807914-supplement-Supplementary_Material.pdf]

## Supplementary Material

### **$\alpha$ SMA<sup>+</sup> fibroblasts suppress Lgr5<sup>+</sup> cancer stem cells and restrain colorectal cancer progression**

Kathleen M. McAndrews<sup>1,†</sup>, Karina Vázquez-Arreguín<sup>1,†</sup>, Changsoo Kwak<sup>1,†</sup>, Hikaru Sugimoto<sup>1</sup>, Xiaofeng Zheng<sup>1</sup>, Bingrui Li<sup>1</sup>, Michelle Kirtley<sup>1</sup>, Valerie S. LeBleu<sup>1,2</sup>, and Raghu Kalluri<sup>1,3,4\*</sup>

<sup>1</sup>*Department of Cancer Biology, Metastasis Research Center, University of Texas MD Anderson Cancer Center, Houston, TX*

<sup>2</sup>*Feinberg School of Medicine, Northwestern University, Chicago, IL*

<sup>3</sup>*Department of Bioengineering, Rice University, Houston, TX*

<sup>4</sup>*Department of Molecular and Cellular Biology, Baylor College of Medicine, Houston, TX*

†Co-first authors

\*Corresponding author:

Raghu Kalluri, MD, PhD

Email: [rkalluri@mdanderson.org](mailto:rkalluri@mdanderson.org)

## Supplementary Figure Legends

## Supplementary Figure 1

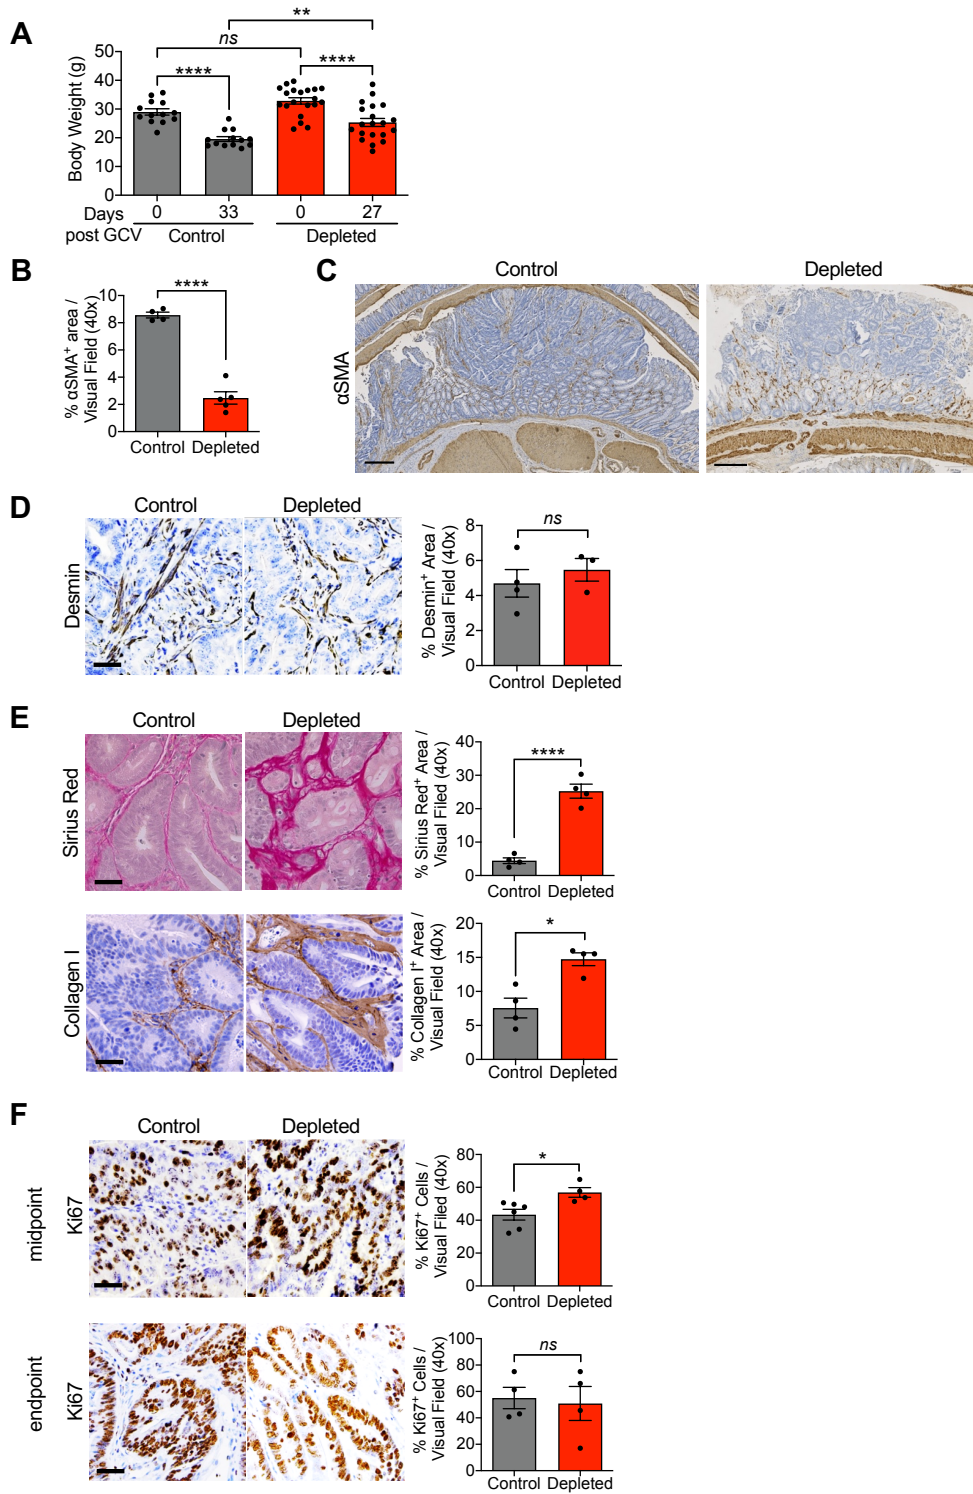

Supplementary Figure 1. Phenotypic characterization of  $\alpha$ SMA<sup>+</sup> CAF-depleted tumors.

**A.** Body weight of control and depleted mice following GCV treatment to deplete  $\alpha$ SMA<sup>+</sup> CAFs. Control, n=13; depleted, n=20. **B.** Quantitation of  $\alpha$ SMA staining in CAF-depleted (n = 5) and control (n = 4) tumors (representative images in Figure 1H). **C.** Representative immunohistochemistry for  $\alpha$ SMA<sup>+</sup> CAF-depleted and control tumors, Scale bar: 200  $\mu$ m. **D.** Representative immunohistochemistry and quantification for desmin in  $\alpha$ SMA<sup>+</sup> CAF-depleted (n = 3) and control (n = 4) tumors, Scale bar: 50  $\mu$ m. **E.** Representative picrosirius red staining and immunohistochemistry for type I collagen in control (n = 4) and (n = 4) depleted tumors, and quantification of staining. Scale bar: 50  $\mu$ m. **F.** Midpoint: Representative immunohistochemistry and quantification for Ki67 in  $\alpha$ SMA<sup>+</sup> CAF-depleted (n = 4) and control (n = 6) tumors at 20 days post GCV. Endpoint: Representative immunohistochemistry and quantification for Ki67 in  $\alpha$ SMA<sup>+</sup> CAF-depleted (n = 4) and control (n = 4) tumors at endpoint. Scale bar: 50  $\mu$ m. GCV: ganciclovir. The data are presented as mean  $\pm$  SEM. **A**, one-way ANOVA with Sidak's multiple comparison test performed; **B, D, E top panel, F**, unpaired t-test performed; **E bottom panel**, Mann-Whitney test performed. \*  $P < 0.05$ , \*\*  $P < 0.01$ , \*\*\*\*  $P < 0.0001$ , *ns*: not significant.

## Supplementary Figure 2

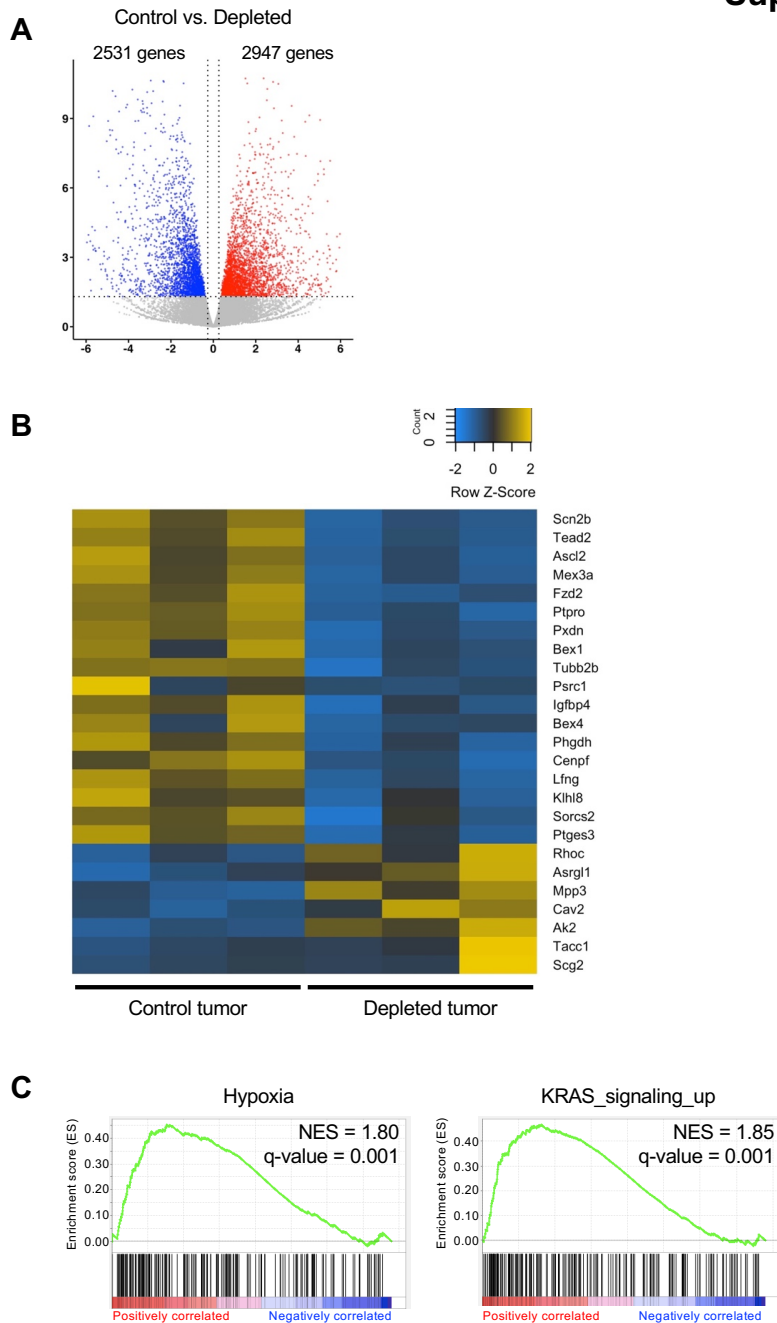

**Supplementary Figure 2. Depleted tumors are associated with malignancy-related gene signatures.**

**A.** Volcano plots showing downregulated and upregulated genes identified by RNA sequencing in control vs. depleted tumors. **B.** Heatmap of genes associated with CRC recurrence in control compared to depleted tumors. **C.** Selected GSEA enrichment plots associated with malignancy

from the RNA analysis comparing control and depleted tumors. FDR: false discovery rate; NES: normalized enrichment score.

### Supplementary Figure 3

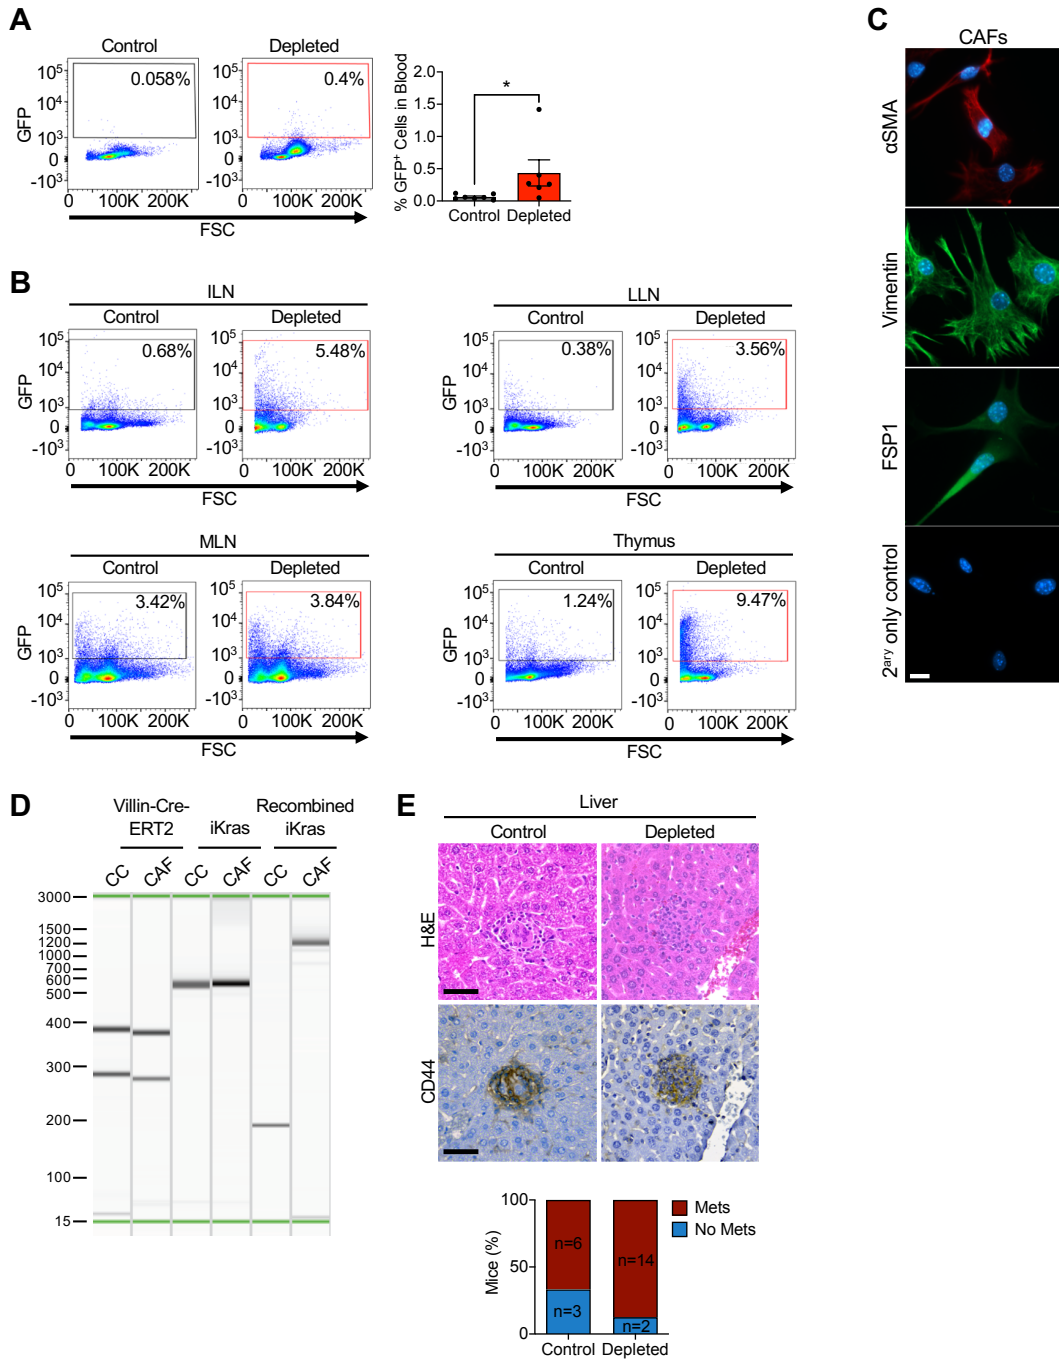

### Supplementary Figure 3. Depletion of $\alpha$ SMA<sup>+</sup> CAFs increases liver metastasis.

**A.** Representative FACS dot plots and quantification of the percentage GFP<sup>+</sup> CTCs in the blood of control (n = 7) and depleted (n = 6) mice at endpoint. **B.** Representative FACS dot plots for data presented in Figure 2B. **C.** Immunostaining of iKAP CAFs for  $\alpha$ SMA (red), vimentin (green),

and FSP-1 (green). Blue nuclei stained with Hoechst. Scale bar: 20  $\mu\text{m}$ .  $2^{\text{ary}}$  only control: no primary antibody, Alexa Fluor 488 secondary antibody only. **D.** Electrogram of PCR products from cancer cells (CC) and CAFs for the indicated alleles. PCR was performed for the Villin-Cre-ERT2 allele (300 and 400 bp), iKras allele (600 bp), and Cre-mediated recombined iKras allele (unrecombined allele: 1000 bp, recombined allele: 180 bp). **E.** Representative images of H&E and CD44 immunohistochemistry in liver sections and quantification of mice with liver metastasis (identified by CD44 staining). Control, n = 9 mice; depleted, n = 16 mice. Scale bars: 100  $\mu\text{m}$ . The data are presented as mean  $\pm$  SEM. **A,** Mann-Whitney test performed. \*  $P < 0.05$ , *ns*: not significant.

## Supplementary Figure 4

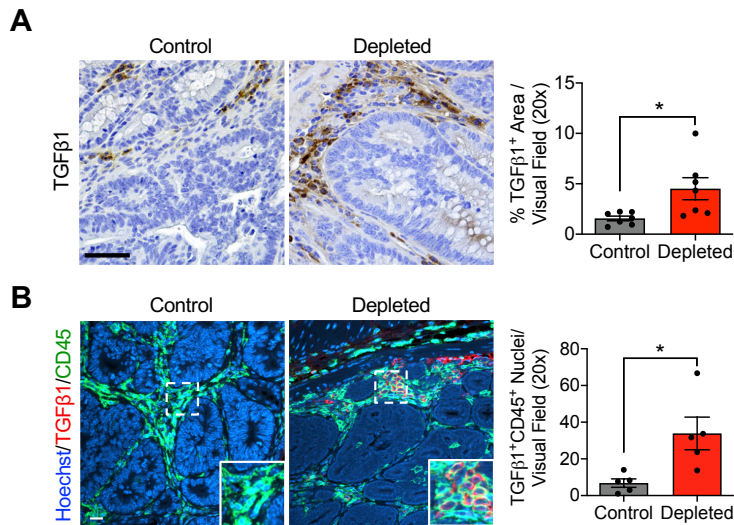

**Supplementary Figure 4.  $\alpha$ SMA<sup>+</sup> CAF-depleted tumors show increased TGFβ1 in immune cells.**

**A.** Representative immunohistochemistry for TGFβ1 in control (n = 7) and depleted (n = 7) tumors and quantification of staining. Scale bar: 50  $\mu$ m. **B.** Costaining for CD45 (green) and TGFβ1 (red) in control (n = 5) and depleted (n = 5) tumors. Scale bar, 20  $\mu$ m. **A, B,** unpaired t-test with Welch's correction performed. \*  $P < 0.05$ , \*\*  $P < 0.01$ , ns: not significant.



## Supplementary Tables

**Supplementary Table 1: Mouse genotypes.**

|      |                      |                        |                |          |                      | Villin-Cre <sup>ERT2</sup> ; LSL-KrasG12D/+; Apc F/F; Trp53 F/F; rtTA |            |       |
|------|----------------------|------------------------|----------------|----------|----------------------|-----------------------------------------------------------------------|------------|-------|
| ID   | Tamoxifen start date | Doxycycline start date | GCV start date | DOD      | GCV treatment (days) | αSMA-TK/0                                                             | αSMA-RFP/0 | Luc/0 |
| G894 | 9/4/15               | 9/4/15                 | 10/26/15       | 11/17/15 | 22                   | 0                                                                     | RFP        | 0     |
| M26  | 9/4/15               | 9/4/15                 | 10/26/15       | 11/12/15 | 17                   | 0                                                                     | RFP        | 0     |
| M129 | 10/28/15             | 10/28/15               | 1/9/16         | 1/28/16  | 19                   | 0                                                                     | 0          | L     |
| M144 | 10/28/15             | 10/28/15               | 1/9/16         | 1/24/16  | 15                   | 0                                                                     | 0          | L     |
| M148 | 10/28/15             | 10/28/15               | 1/9/16         | 1/16/16  | 7                    | 0                                                                     | 0          | L     |
| V226 | 12/8/15              | 12/8/15                | 2/2/16         | 2/21/16  | 19                   | 0                                                                     | RFP        | n.d.  |
| V202 | 12/8/15              | 12/8/15                | 2/2/16         | 3/2/16   | 29                   | 0                                                                     | RFP        | 0     |
| M196 | 12/8/15              | 12/8/15                | 2/2/16         | 3/30/16  | 57                   | 0                                                                     | 0          | 0     |
| V218 | 12/8/15              | 12/8/15                | 2/2/16         | 3/26/16  | 53                   | 0                                                                     | 0          | n.d.  |
| M200 | 12/8/15              | 12/8/15                | 2/2/16         | 3/10/16  | 37                   | 0                                                                     | 0          | n.d.  |
| V227 | 12/8/15              | 12/8/15                | 2/2/16         | 6/6/16   | 125                  | 0                                                                     | RFP        | n.d.  |
| 159F | 12/8/15              | 12/8/15                | 2/2/16         | 3/23/16  | 50                   | 0                                                                     | RFP        | n.d.  |
| V212 | 12/8/15              | 12/8/15                | 2/2/16         | 3/13/16  | 40                   | 0                                                                     | 0          | n.d.  |
| V215 | 12/8/15              | 12/8/15                | 2/2/16         | 3/15/16  | 42                   | 0                                                                     | 0          | 0     |
| V232 | 12/8/15              | 12/8/15                | 2/2/16         | 5/5/16   | 93                   | 0                                                                     | RFP        | n.d.  |
| V264 | 1/3/16               | 1/3/16                 | 2/19/16        | 4/10/16  | 51                   | 0                                                                     | 0          | L     |
| V271 | 1/3/16               | 1/3/16                 | 2/19/16        | 4/29/16  | 70                   | 0                                                                     | 0          | L     |
| V269 | 1/3/16               | 1/3/16                 | 2/19/16        | 3/23/16  | 33                   | 0                                                                     | 0          | L     |
| V282 | 1/3/16               | 1/3/16                 | 2/19/16        | 3/17/16  | 27                   | 0                                                                     | 0          | L     |
| V275 | 1/3/16               | 1/3/16                 | 2/19/16        | 6/25/16  | 127                  | 0                                                                     | RFP        | L     |
| V276 | 1/3/16               | 1/3/16                 | 2/19/16        | 6/11/16  | 113                  | 0                                                                     | 0          | L     |
| V325 | 1/3/16               | 1/3/16                 | 2/19/16        | 4/9/16   | 50                   | 0                                                                     | RFP        | L     |
| V299 | 1/3/16               | 1/3/16                 | 2/19/16        | 7/25/16  | 157                  | 0                                                                     | 0          | L     |
| V302 | 1/3/16               | 1/3/16                 | 2/19/16        | 3/21/16  | 31                   | 0                                                                     | RFP        | L     |

|      |                      |                        |                |          |                      | Villin-Cre <sup>ERT2</sup> ; LSL-KrasG12D/+; Apc F/F; Trp53 F/F; rTA |             |       |
|------|----------------------|------------------------|----------------|----------|----------------------|----------------------------------------------------------------------|-------------|-------|
| ID   | Tamoxifen start date | Doxycycline start date | GCV start date | DOD      | GCV treatment (days) | α-SMA-TK/0                                                           | α-SMA-RFP/0 | Luc/0 |
| G826 | 9/4/15               | 9/4/15                 | 10/26/15       | 11/2/15  | 7                    | TK                                                                   | 0           | n.d.  |
| G846 | 9/4/15               | 9/4/15                 | 10/26/15       | 11/27/15 | 32                   | TK                                                                   | 0           | L     |
| G862 | 9/4/15               | 9/4/15                 | 10/26/15       | 12/1/15  | 36                   | TK                                                                   | 0           | L     |
| G876 | 9/4/15               | 9/4/15                 | 10/26/15       | 10/30/15 | 4                    | TK                                                                   | RFP         | L     |
| G877 | 9/4/15               | 9/4/15                 | 10/26/15       | 12/3/15  | 38                   | TK                                                                   | RFP         | L     |
| G893 | 9/4/15               | 9/4/15                 | 10/26/15       | 11/24/15 | 29                   | TK                                                                   | 0           | L     |
| M2   | 9/4/15               | 9/4/15                 | 10/26/15       | 11/27/15 | 32                   | TK                                                                   | 0           | L     |
| M9   | 9/4/15               | 9/4/15                 | 10/26/15       | 11/6/15  | 11                   | TK                                                                   | 0           | 0     |
| M11  | 9/4/15               | 9/4/15                 | 10/26/15       | 12/3/15  | 38                   | TK                                                                   | 0           | L     |
| M80  | 10/28/15             | 10/28/15               | 1/9/16         | 1/26/16  | 17                   | TK                                                                   | 0           | 0     |
| M126 | 10/28/15             | 10/28/15               | 1/9/16         | 1/27/16  | 18                   | TK                                                                   | 0           | 0     |
| M169 | 12/8/15              | 12/8/15                | 2/2/16         | 3/4/16   | 31                   | TK                                                                   | RFP         | L     |
| V204 | 12/8/15              | 12/8/15                | 2/2/16         | 2/15/16  | 13                   | TK                                                                   | RFP         | n.d.  |
| V225 | 12/8/15              | 12/8/15                | 2/2/16         | 2/28/16  | 26                   | TK                                                                   | 0           | n.d.  |
| V228 | 12/8/15              | 12/8/15                | 2/2/16         | 3/4/16   | 31                   | TK                                                                   | RFP         | 0     |
| V234 | 12/8/15              | 12/8/15                | 2/2/16         | 3/4/16   | 31                   | TK                                                                   | 0           | 0     |
| 160F | 12/8/15              | 12/8/15                | 2/2/16         | 3/4/16   | 31                   | TK                                                                   | RFP         | 0     |
| V213 | 12/8/15              | 12/8/15                | 2/2/16         | 3/8/16   | 35                   | TK                                                                   | 0           | 0     |
| V265 | 1/3/16               | 1/3/16                 | 2/19/16        | 3/25/16  | 35                   | TK                                                                   | RFP         | L     |
| V277 | 1/3/16               | 1/3/16                 | 2/19/16        | 3/25/16  | 35                   | TK                                                                   | 0           | L     |
| V297 | 1/3/16               | 1/3/16                 | 2/19/16        | 3/17/16  | 27                   | TK                                                                   | RFP         | L     |
| V284 | 1/3/16               | 1/3/16                 | 2/19/16        | 3/13/16  | 23                   | TK                                                                   | 0           | L     |
| V324 | 1/3/16               | 1/3/16                 | 2/19/16        | 3/20/16  | 30                   | TK                                                                   | RFP         | L     |
| V295 | 1/3/16               | 1/3/16                 | 2/19/16        | 3/17/16  | 27                   | TK                                                                   | 0           | 0     |
| V305 | 1/3/16               | 1/3/16                 | 2/19/16        | 3/20/16  | 30                   | TK                                                                   | 0           | L     |
| V304 | 1/3/16               | 1/3/16                 | 2/19/16        | 3/25/16  | 35                   | TK                                                                   | 0           | L     |
| V319 | 1/3/16               | 1/3/16                 | 2/19/16        | 3/17/16  | 27                   | TK                                                                   | 0           | L     |
| V327 | 1/21/16              | 1/21/16                | 3/9/16         | 3/26/16  | 17                   | TK                                                                   | 0           | L     |
| V336 | 1/21/16              | 1/21/16                | 3/9/16         | 3/22/16  | 13                   | TK                                                                   | 0           | 0     |
| V350 | 1/21/16              | 1/21/16                | 3/9/16         | 3/25/16  | 16                   | TK                                                                   | 0           | L     |
| V356 | 1/21/16              | 1/21/16                | 3/9/16         | 4/5/16   | 27                   | TK                                                                   | 0           | L     |
| V382 | 1/21/16              | 1/21/16                | 3/9/16         | 3/29/16  | 20                   | TK                                                                   | RFP         | 0     |

n.d.: not determined

**Supplementary Table 2: GSEA of differentially regulated pathways in depleted compared to control tumors.**

**Positively regulated pathways**

| Pathway name                       | Size | ES     | NES    | Nom p-val | FDR q-val | FWER p-val | Rank at max | Leading edge                   |
|------------------------------------|------|--------|--------|-----------|-----------|------------|-------------|--------------------------------|
| HALLMARK_TNFA_SIGNALING_VIA_NFKB   | 191  | 0.5698 | 2.2740 | 0.0000    | 0.0000    | 0.0000     | 3083        | tags=47%, list=20%, signal=58% |
| HALLMARK_INFLAMMATORY_RESPONSE     | 191  | 0.5229 | 2.0725 | 0.0000    | 0.0000    | 0.0000     | 2203        | tags=32%, list=14%, signal=37% |
| HALLMARK_KRAS_SIGNALING_UP         | 192  | 0.4662 | 1.8504 | 0.0000    | 0.0014    | 0.0040     | 3262        | tags=40%, list=21%, signal=49% |
| HALLMARK_PANCREAS_BETA_CELLS       | 39   | 0.5808 | 1.8070 | 0.0000    | 0.0013    | 0.0050     | 1629        | tags=33%, list=10%, signal=37% |
| HALLMARK_HYPOXIA                   | 185  | 0.4520 | 1.7988 | 0.0000    | 0.0012    | 0.0060     | 3062        | tags=36%, list=20%, signal=44% |
| HALLMARK_INTERFERON_GAMMA_RESPONSE | 181  | 0.4500 | 1.7595 | 0.0000    | 0.0020    | 0.0120     | 4257        | tags=42%, list=27%, signal=57% |
| HALLMARK_IL6_JAK_STAT3_SIGNALING   | 83   | 0.4830 | 1.7322 | 0.0000    | 0.0024    | 0.0160     | 4377        | tags=46%, list=28%, signal=63% |
| HALLMARK_APOPTOSIS                 | 152  | 0.3810 | 1.4768 | 0.0066    | 0.0490    | 0.3360     | 3243        | tags=32%, list=21%, signal=39% |
| HALLMARK_KRAS_SIGNALING_DN         | 175  | 0.3619 | 1.4254 | 0.0090    | 0.0751    | 0.4930     | 2313        | tags=33%, list=15%, signal=38% |
| HALLMARK_SPERMATOGENESIS           | 119  | 0.3644 | 1.3698 | 0.0234    | 0.1175    | 0.7050     | 1911        | tags=24%, list=12%, signal=27% |
| HALLMARK_P53_PATHWAY               | 181  | 0.3377 | 1.3437 | 0.0240    | 0.1367    | 0.7870     | 4082        | tags=36%, list=26%, signal=48% |
| HALLMARK_IL2_STAT5_SIGNALING       | 188  | 0.3298 | 1.3095 | 0.0395    | 0.1725    | 0.8810     | 4031        | tags=36%, list=26%, signal=48% |
| HALLMARK_COMPLEMENT                | 172  | 0.3302 | 1.3021 | 0.0452    | 0.1698    | 0.8950     | 3865        | tags=37%, list=25%, signal=49% |
| HALLMARK_BILE_ACID_METABOLISM      | 107  | 0.3486 | 1.2952 | 0.0749    | 0.1682    | 0.9110     | 4249        | tags=35%, list=27%, signal=47% |
| HALLMARK_MYOGENESIS                | 190  | 0.3246 | 1.2839 | 0.0529    | 0.1729    | 0.9410     | 3167        | tags=28%, list=20%, signal=35% |
| HALLMARK_ESTROGEN_RESPONSE_EARLY   | 189  | 0.3220 | 1.2723 | 0.0651    | 0.1779    | 0.9540     | 3720        | tags=34%, list=24%, signal=44% |
| HALLMARK_OXIDATIVE_PHOSPHORYLATION | 188  | 0.3194 | 1.2667 | 0.0661    | 0.1753    | 0.9580     | 5781        | tags=48%, list=37%, signal=76% |

|                                          |     |        |        |        |        |        |      |                                      |
|------------------------------------------|-----|--------|--------|--------|--------|--------|------|--------------------------------------|
| HALLMARK_UV_RESPONSE_UP                  | 147 | 0.3237 | 1.2483 | 0.0950 | 0.1910 | 0.9770 | 3667 | tags=31%,<br>list=24%,<br>signal=40% |
| HALLMARK_HEME_METABOLISM                 | 181 | 0.3180 | 1.2378 | 0.0846 | 0.1971 | 0.9840 | 4902 | tags=42%,<br>list=31%,<br>signal=61% |
| HALLMARK_ALLOGRAFT_REJECTION             | 180 | 0.3104 | 1.2270 | 0.0904 | 0.2046 | 0.9890 | 2729 | tags=25%,<br>list=18%,<br>signal=30% |
| HALLMARK_XENOBIOTIC_METABOLISM           | 180 | 0.3020 | 1.1947 | 0.1089 | 0.2516 | 0.9940 | 4393 | tags=43%,<br>list=28%,<br>signal=60% |
| HALLMARK_ADIPOGENESIS                    | 188 | 0.2933 | 1.1585 | 0.1680 | 0.3073 | 0.9990 | 5339 | tags=44%,<br>list=34%,<br>signal=66% |
| HALLMARK_COAGULATION                     | 121 | 0.3051 | 1.1490 | 0.2025 | 0.3153 | 0.9990 | 3806 | tags=40%,<br>list=24%,<br>signal=52% |
| HALLMARK_ANDROGEN_RESPONSE               | 93  | 0.3146 | 1.1391 | 0.2122 | 0.3216 | 0.9990 | 4471 | tags=37%,<br>list=29%,<br>signal=51% |
| HALLMARK_HEDGEHOG_SIGNALING              | 36  | 0.3694 | 1.1254 | 0.2825 | 0.3384 | 0.9990 | 3567 | tags=36%,<br>list=23%,<br>signal=47% |
| HALLMARK_PROTEIN_SECRETION               | 93  | 0.2960 | 1.0696 | 0.3314 | 0.4584 | 1.0000 | 6099 | tags=48%,<br>list=39%,<br>signal=79% |
| HALLMARK_ESTROGEN_RESPONSE_LATE          | 189 | 0.2607 | 1.0437 | 0.3718 | 0.5086 | 1.0000 | 3286 | tags=26%,<br>list=21%,<br>signal=33% |
| HALLMARK_UV_RESPONSE_DN                  | 135 | 0.2702 | 1.0384 | 0.3808 | 0.5038 | 1.0000 | 4642 | tags=37%,<br>list=30%,<br>signal=52% |
| HALLMARK_CHOLESTEROL_HOMEOSTASIS         | 71  | 0.2855 | 0.9909 | 0.4703 | 0.6101 | 1.0000 | 4582 | tags=38%,<br>list=29%,<br>signal=54% |
| HALLMARK_INTERFERON_ALPHA_RESPONSE       | 86  | 0.2671 | 0.9339 | 0.5741 | 0.7486 | 1.0000 | 4257 | tags=36%,<br>list=27%,<br>signal=49% |
| HALLMARK_APICAL_JUNCTION                 | 193 | 0.2301 | 0.9176 | 0.6845 | 0.7691 | 1.0000 | 4332 | tags=29%,<br>list=28%,<br>signal=40% |
| HALLMARK_REACTIVE_OXYGEN_SPECIES_PATHWAY | 45  | 0.2732 | 0.8774 | 0.6769 | 0.8487 | 1.0000 | 5686 | tags=44%,<br>list=36%,<br>signal=70% |
| HALLMARK_GLYCOLYSIS                      | 193 | 0.2187 | 0.8625 | 0.8048 | 0.8588 | 1.0000 | 4090 | tags=27%,<br>list=26%,<br>signal=37% |
| HALLMARK_TGF_BETA_SIGNALING              | 52  | 0.2534 | 0.8450 | 0.7504 | 0.8726 | 1.0000 | 3706 | tags=23%,<br>list=24%,<br>signal=30% |
| HALLMARK_FATTY_ACID_METABOLISM           | 148 | 0.2178 | 0.8364 | 0.8302 | 0.8656 | 1.0000 | 5167 | tags=35%,<br>list=33%,<br>signal=52% |
| HALLMARK_PEROXISOME                      | 100 | 0.2221 | 0.8060 | 0.8818 | 0.8962 | 1.0000 | 5401 | tags=43%,<br>list=35%,<br>signal=65% |
| HALLMARK_PI3K_AKT_MTOR_SIGNALING         | 99  | 0.2140 | 0.7784 | 0.9032 | 0.9130 | 1.0000 | 5465 | tags=36%,<br>list=35%,<br>signal=56% |

**Negatively regulated pathways**

| Pathway name                               | Size | ES      | NES     | Nom p-val | FDR q-val | FWER p-val | RANK AT MAX | LEADING EDGE                         |
|--------------------------------------------|------|---------|---------|-----------|-----------|------------|-------------|--------------------------------------|
| HALLMARK_E2F_TARGETS                       | 186  | -0.6553 | -2.9231 | 0.0000    | 0.0000    | 0.0000     | 3513        | tags=69%,<br>list=23%,<br>signal=88% |
| HALLMARK_G2M_CHECKPOINT                    | 185  | -0.5678 | -2.5512 | 0.0000    | 0.0000    | 0.0000     | 3138        | tags=50%,<br>list=20%,<br>signal=62% |
| HALLMARK_MYC_TARGETS_V1                    | 183  | -0.5155 | -2.3179 | 0.0000    | 0.0000    | 0.0000     | 4648        | tags=57%,<br>list=30%,<br>signal=80% |
| HALLMARK_MITOTIC_SPINDLE                   | 196  | -0.4308 | -1.9542 | 0.0000    | 0.0000    | 0.0000     | 4419        | tags=41%,<br>list=28%,<br>signal=56% |
| HALLMARK_MYC_TARGETS_V2                    | 54   | -0.5144 | -1.9091 | 0.0000    | 0.0000    | 0.0000     | 4044        | tags=65%,<br>list=26%,<br>signal=87% |
| HALLMARK_WNT_BETA_CATENIN_SIGNALING        | 39   | -0.4885 | -1.6423 | 0.0118    | 0.0032    | 0.0190     | 1550        | tags=28%,<br>list=10%,<br>signal=31% |
| HALLMARK_DNA_REPAIR                        | 138  | -0.3401 | -1.4742 | 0.0000    | 0.0178    | 0.1190     | 4204        | tags=39%,<br>list=27%,<br>signal=53% |
| HALLMARK_ANGIOGENESIS                      | 34   | -0.3474 | -1.1690 | 0.2282    | 0.2272    | 0.8400     | 1968        | tags=24%,<br>list=13%,<br>signal=27% |
| HALLMARK_EPITHELIAL_MESENCHYMAL_TRANSITION | 189  | -0.2557 | -1.1540 | 0.1159    | 0.2261    | 0.8650     | 2086        | tags=23%,<br>list=13%,<br>signal=26% |
| HALLMARK_APICAL_SURFACE                    | 41   | -0.2813 | -1.0056 | 0.4548    | 0.5691    | 0.9990     | 3360        | tags=39%,<br>list=22%,<br>signal=50% |
| HALLMARK_NOTCH_SIGNALING                   | 32   | -0.2834 | -0.9359 | 0.5924    | 0.7451    | 1.0000     | 1550        | tags=19%,<br>list=10%,<br>signal=21% |
| HALLMARK_MTORC1_SIGNALING                  | 188  | -0.1998 | -0.9095 | 0.7416    | 0.7652    | 1.0000     | 3855        | tags=28%,<br>list=25%,<br>signal=36% |
| HALLMARK_UNFOLDED_PROTEIN_RESPONSE         | 107  | -0.1958 | -0.8088 | 0.9018    | 0.9054    | 1.0000     | 3872        | tags=29%,<br>list=25%,<br>signal=38% |
